# Supplementary material
Source: MDPI journal article supplement (https://www.mdpi.com/2076-0752/13/1/23)
Supplement: s1 [file s1]

|                           | Budapest (1920) | Amsterdam (1922) | Finland/Estonia (1922) | Stockholm (1922) | Vienna (1924) | Warsaw (1927) |
|---------------------------|-----------------|------------------|------------------------|------------------|---------------|---------------|
| Bayer Ágoston             |                 |                  |                        |                  |               |               |
| Aba Novák Vilmos          |                 |                  |                        |                  |               |               |
| Áldor János László        |                 |                  |                        |                  |               |               |
| Antal József              |                 |                  |                        |                  |               |               |
| Aszódi Weil Erzsébet      |                 |                  |                        |                  |               |               |
| Balló Ede                 |                 |                  |                        |                  |               |               |
| Banffy Miklos             |                 |                  |                        |                  |               |               |
| Baranski E. László        |                 |                  |                        |                  |               |               |
| Bardócz Árpád             |                 |                  |                        |                  |               |               |
| Barkász Lajos             |                 |                  |                        |                  |               |               |
| Barta Ernő                |                 |                  |                        |                  |               |               |
| Barzó Endre               |                 |                  |                        |                  |               |               |
| Basch Andor               |                 |                  |                        |                  |               |               |
| Batthyány Gyula           |                 |                  |                        |                  |               |               |
| Bayer August              |                 |                  |                        |                  |               |               |
| Beck Ödön Fülöp           |                 |                  |                        |                  |               |               |
| Belányi Viktor            |                 |                  |                        |                  |               |               |
| Béli Vörös Ernő           |                 |                  |                        |                  |               |               |
| Benczúr Gyula             |                 |                  |                        |                  |               |               |
| Bene Géza                 |                 |                  |                        |                  |               |               |
| Benkhard Ágost            |                 |                  |                        |                  |               |               |
| Berán Lajos               |                 |                  |                        |                  |               |               |
| Beron Gyula               |                 |                  |                        |                  |               |               |
| Biczó Ilona               |                 |                  |                        |                  |               |               |
| Biró József               |                 |                  |                        |                  |               |               |
| Bitzo Ilona               |                 |                  |                        |                  |               |               |
| Bornemisza Géza           |                 |                  |                        |                  |               |               |
| Boruth Andor              |                 |                  |                        |                  |               |               |
| Bory Jenő                 |                 |                  |                        |                  |               |               |
| Bosznay István            |                 |                  |                        |                  |               |               |
| Bruck Lajos               |                 |                  |                        |                  |               |               |
| Bruck Miksa               |                 |                  |                        |                  |               |               |
| Brüll Aladár              |                 |                  |                        |                  |               |               |
| Burghardt Rezső Zsombolya |                 |                  |                        |                  |               |               |
| Conrad Gyula              |                 |                  |                        |                  |               |               |
| Csánky Dénes              |                 |                  |                        |                  |               |               |
| Cserna József             |                 |                  |                        |                  |               |               |
| Csizik Gyula              |                 |                  |                        |                  |               |               |
| Csók István               |                 |                  |                        |                  |               |               |
| Csuk Jenő                 |                 |                  |                        |                  |               |               |
| Czencz János              |                 |                  |                        |                  |               |               |
| Damkó József              |                 |                  |                        |                  |               |               |
| Deli Antal                |                 |                  |                        |                  |               |               |
| Déry Béla                 |                 |                  |                        |                  |               |               |
| Diósy Antal               |                 |                  |                        |                  |               |               |
| Dudits Andor              |                 |                  |                        |                  |               |               |
| Edvi Illés Aladár         |                 |                  |                        |                  |               |               |

|                            | Budapest (1920) | Amsterdam (1922) | Finland/Estonia (1922) | Stockholm (1922) | Vienna (1924) | Warsaw (1927) |
|----------------------------|-----------------|------------------|------------------------|------------------|---------------|---------------|
| Emanuel Béla               |                 |                  |                        |                  |               |               |
| Emőd Aurél                 |                 |                  |                        |                  |               |               |
| Fábián Gyula               |                 |                  |                        |                  |               |               |
| Farkas Zoltan              |                 |                  |                        |                  |               |               |
| Farkasházy Miklós          |                 |                  |                        |                  |               |               |
| Fáy Dezső                  |                 |                  |                        |                  |               |               |
| Feiks Alfréd               |                 |                  |                        |                  |               |               |
| Feiks Jenő                 |                 |                  |                        |                  |               |               |
| Fényes Adolf               |                 |                  |                        |                  |               |               |
| Fenyő Andor Endre          |                 |                  |                        |                  |               |               |
| Ferenczy Károly            |                 |                  |                        |                  |               |               |
| Ferenczy Valér             |                 |                  |                        |                  |               |               |
| Feszty Masa Mária          |                 |                  |                        |                  |               |               |
| Frank Frigyes              |                 |                  |                        |                  |               |               |
| Gaál Ferenc                |                 |                  |                        |                  |               |               |
| Gábor Moritz               |                 |                  |                        |                  |               |               |
| Gadányi Jenő               |                 |                  |                        |                  |               |               |
| Garay Ákos                 |                 |                  |                        |                  |               |               |
| Gárdos Aladár              |                 |                  |                        |                  |               |               |
| Gerber Magda               |                 |                  |                        |                  |               |               |
| Gimes Lajos                |                 |                  |                        |                  |               |               |
| Glatter Gyula              |                 |                  |                        |                  |               |               |
| Glatz Oszkár               |                 |                  |                        |                  |               |               |
| Glatz Wildner Mária        |                 |                  |                        |                  |               |               |
| Góth Móric                 |                 |                  |                        |                  |               |               |
| Gregersen Hugó             |                 |                  |                        |                  |               |               |
| Gy. Sándor József          |                 |                  |                        |                  |               |               |
| Győrfy István              |                 |                  |                        |                  |               |               |
| Gyűgyei Nagy Zsigmond      |                 |                  |                        |                  |               |               |
| Hadzsy Olga                |                 |                  |                        |                  |               |               |
| Halápy Ede                 |                 |                  |                        |                  |               |               |
| Haranghy Jenő              |                 |                  |                        |                  |               |               |
| Háry Gyula                 |                 |                  |                        |                  |               |               |
| Hatvany Ferenc             |                 |                  |                        |                  |               |               |
| Hende Vince                |                 |                  |                        |                  |               |               |
| Herman Lipót               |                 |                  |                        |                  |               |               |
| Hollósy Simon              |                 |                  |                        |                  |               |               |
| Hornay Ödön                |                 |                  |                        |                  |               |               |
| Horthy Béla                |                 |                  |                        |                  |               |               |
| Horvai János               |                 |                  |                        |                  |               |               |
| Horváth Géza               |                 |                  |                        |                  |               |               |
| Horvay János               |                 |                  |                        |                  |               |               |
| Illenczfalvi Sárkány Gyula |                 |                  |                        |                  |               |               |
| Istók János                |                 |                  |                        |                  |               |               |
| Istókovits Kálmán          |                 |                  |                        |                  |               |               |
| Iványi-Grünwald Béla       |                 |                  |                        |                  |               |               |
| Jaschik Álmos              |                 |                  |                        |                  |               |               |

|                             | Budapest (1920) | Amsterdam (1922) | Finland/Estonia (1922) | Stockholm (1922) | Vienna (1924) | Warsaw (1927) |
|-----------------------------|-----------------|------------------|------------------------|------------------|---------------|---------------|
| Jávor Pál                   |                 |                  |                        |                  |               |               |
| Kacziány Aladár             |                 |                  |                        |                  |               |               |
| Kacziány Ödön               |                 |                  |                        |                  |               |               |
| Kallós Ede                  |                 |                  |                        |                  |               |               |
| Kárpáthy Jenő               |                 |                  |                        |                  |               |               |
| Kató Kálmán                 |                 |                  |                        |                  |               |               |
| Katona Nándor               |                 |                  |                        |                  |               |               |
| Kézdi Kovács László         |                 |                  |                        |                  |               |               |
| Kisfaludi Strobl Zsigmond   |                 |                  |                        |                  |               |               |
| Kiss Sarolta                |                 |                  |                        |                  |               |               |
| Klie Zoltán                 |                 |                  |                        |                  |               |               |
| Knopp Curtis Gertrude       |                 |                  |                        |                  |               |               |
| Knopp Imre                  |                 |                  |                        |                  |               |               |
| Kohner Ida                  |                 |                  |                        |                  |               |               |
| Kölber Dezső                |                 |                  |                        |                  |               |               |
| Komáromi-Kacz Endre         |                 |                  |                        |                  |               |               |
| Komjáti Wanyerka Gyula      |                 |                  |                        |                  |               |               |
| Korb Erzsébet               |                 |                  |                        |                  |               |               |
| Korda Vince                 |                 |                  |                        |                  |               |               |
| Körmendi-Frim Jenő          |                 |                  |                        |                  |               |               |
| Körösfői Kriesch Aladár     |                 |                  |                        |                  |               |               |
| Koszkol Jenő                |                 |                  |                        |                  |               |               |
| Kosztá József               |                 |                  |                        |                  |               |               |
| Kosztolányi Kann Gyula      |                 |                  |                        |                  |               |               |
| Kotász Károly               |                 |                  |                        |                  |               |               |
| Kövr Gyula                  |                 |                  |                        |                  |               |               |
| Kövesdy Géza                |                 |                  |                        |                  |               |               |
| Kövesházi Kalmár Elza       |                 |                  |                        |                  |               |               |
| Krivátsy Szűts Miklós       |                 |                  |                        |                  |               |               |
| Kukán Géza                  |                 |                  |                        |                  |               |               |
| Kunffy Lajos                |                 |                  |                        |                  |               |               |
| Kunwald Cézár               |                 |                  |                        |                  |               |               |
| L. Egyed Erna               |                 |                  |                        |                  |               |               |
| Lakatos Artúr               |                 |                  |                        |                  |               |               |
| Lányi Dezső                 |                 |                  |                        |                  |               |               |
| László Fülöp Elek           |                 |                  |                        |                  |               |               |
| Lénárd Róbert               |                 |                  |                        |                  |               |               |
| Lichtenberg-Propper Aurelia |                 |                  |                        |                  |               |               |
| Ligeti Miklós               |                 |                  |                        |                  |               |               |
| Lohwag Ernesztin            |                 |                  |                        |                  |               |               |
| Lohwag Frida                |                 |                  |                        |                  |               |               |
| Lotz Károly                 |                 |                  |                        |                  |               |               |
| Lux Elek                    |                 |                  |                        |                  |               |               |
| Magyar-Mannheimer Gusztáv   |                 |                  |                        |                  |               |               |
| Major Jenő                  |                 |                  |                        |                  |               |               |
| Makoldy József              |                 |                  |                        |                  |               |               |
| Márffy Ödön                 |                 |                  |                        |                  |               |               |

|                              | Budapest (1920) | Amsterdam (1922) | Finland/Estonia (1922) | Stockholm (1922) | Vienna (1924) | Warsaw (1927) |
|------------------------------|-----------------|------------------|------------------------|------------------|---------------|---------------|
| Márk Lajos                   |                 |                  |                        |                  |               |               |
| Markó Károly                 |                 |                  |                        |                  |               |               |
| Markup Béla                  |                 |                  |                        |                  |               |               |
| Maróthi Major Jenő           |                 |                  |                        |                  |               |               |
| Maróti Rintel Géza           |                 |                  |                        |                  |               |               |
| Márton Ferenc                |                 |                  |                        |                  |               |               |
| Mattyasovszky Zsolnay László |                 |                  |                        |                  |               |               |
| Mednyánszky László           |                 |                  |                        |                  |               |               |
| Mendlik Oszkár               |                 |                  |                        |                  |               |               |
| Merész Gyula                 |                 |                  |                        |                  |               |               |
| Mérő István                  |                 |                  |                        |                  |               |               |
| Mészöly Géza                 |                 |                  |                        |                  |               |               |
| Mihalovits Miklós            |                 |                  |                        |                  |               |               |
| Miskolczy Ferenc             |                 |                  |                        |                  |               |               |
| Moiret Ödön                  |                 |                  |                        |                  |               |               |
| Munkácsy Mihály              |                 |                  |                        |                  |               |               |
| Muzsinszky-Nagy Endre        |                 |                  |                        |                  |               |               |
| Nádler Róbert                |                 |                  |                        |                  |               |               |
| Nagy István                  |                 |                  |                        |                  |               |               |
| Nagy Sándor                  |                 |                  |                        |                  |               |               |
| Nagy Vilmos                  |                 |                  |                        |                  |               |               |
| Nyilassy Sándor              |                 |                  |                        |                  |               |               |
| Olgyay Ferenc                |                 |                  |                        |                  |               |               |
| Paál László                  |                 |                  |                        |                  |               |               |
| Paizs Goebel Jenő            |                 |                  |                        |                  |               |               |
| Pállik Béla                  |                 |                  |                        |                  |               |               |
| Pásztor János                |                 |                  |                        |                  |               |               |
| Pécsi Pilch Dezső            |                 |                  |                        |                  |               |               |
| Pentelei Molnár János        |                 |                  |                        |                  |               |               |
| Perlmutter Izsák             |                 |                  |                        |                  |               |               |
| Petri Lajos Pick             |                 |                  |                        |                  |               |               |
| Poll Hugó                    |                 |                  |                        |                  |               |               |
| Raáb Ervin                   |                 |                  |                        |                  |               |               |
| Ráfael Győző                 |                 |                  |                        |                  |               |               |
| Reményi József               |                 |                  |                        |                  |               |               |
| Remsey Jenő György           |                 |                  |                        |                  |               |               |
| Réti István                  |                 |                  |                        |                  |               |               |
| Ringer Erzsébet              |                 |                  |                        |                  |               |               |
| Rippl-Rónai József           |                 |                  |                        |                  |               |               |
| Romek Árpád                  |                 |                  |                        |                  |               |               |
| Róna József                  |                 |                  |                        |                  |               |               |
| Rudnay Gyula                 |                 |                  |                        |                  |               |               |
| Sándor József                |                 |                  |                        |                  |               |               |
| Sándor Nagy                  |                 |                  |                        |                  |               |               |
| Sidló Ferenc                 |                 |                  |                        |                  |               |               |
| Simai Imre                   |                 |                  |                        |                  |               |               |
| Stellek Dénes                |                 |                  |                        |                  |               |               |

|                           | Budapest (1920) | Amsterdam (1922) | Finland/Estonia (1922) | Stockholm (1922) | Vienna (1924) | Warsaw (1927) |
|---------------------------|-----------------|------------------|------------------------|------------------|---------------|---------------|
| Strobenz Frigyes          |                 |                  |                        |                  |               |               |
| Szablya-Frischauf Ferenc  |                 |                  |                        |                  |               |               |
| Székely Bertalan          |                 |                  |                        |                  |               |               |
| Székely Dobai Andor       |                 |                  |                        |                  |               |               |
| Szentgyörgyi István       |                 |                  |                        |                  |               |               |
| Szigeti (Schönfeld) Jenő  |                 |                  |                        |                  |               |               |
| Szinyei Merse Pál         |                 |                  |                        |                  |               |               |
| Szlányi Lajos             |                 |                  |                        |                  |               |               |
| Szmrecsányi "Pajtás" Ödön |                 |                  |                        |                  |               |               |
| Szobotka Imre             |                 |                  |                        |                  |               |               |
| Szőnyi István             |                 |                  |                        |                  |               |               |
| Szüle Péter               |                 |                  |                        |                  |               |               |
| Tarjáni Simkovics Jenő    |                 |                  |                        |                  |               |               |
| Tatz László               |                 |                  |                        |                  |               |               |
| Telcs Ede                 |                 |                  |                        |                  |               |               |
| Telkessy Valér            |                 |                  |                        |                  |               |               |
| Thorma János              |                 |                  |                        |                  |               |               |
| Tichy Gyula               |                 |                  |                        |                  |               |               |
| Tichy Kálmán              |                 |                  |                        |                  |               |               |
| Tölgyessy Artúr           |                 |                  |                        |                  |               |               |
| Tolnai Ákos               |                 |                  |                        |                  |               |               |
| Tornai Gyula              |                 |                  |                        |                  |               |               |
| Tóth Gyula                |                 |                  |                        |                  |               |               |
| Túry Gyula                |                 |                  |                        |                  |               |               |
| Udvary Géza               |                 |                  |                        |                  |               |               |
| Udvary Pál                |                 |                  |                        |                  |               |               |
| Vágó Pál                  |                 |                  |                        |                  |               |               |
| Vajda Zsigmond            |                 |                  |                        |                  |               |               |
| Várady Gyula              |                 |                  |                        |                  |               |               |
| Varga Nándor Lajos        |                 |                  |                        |                  |               |               |
| Vass Elemér               |                 |                  |                        |                  |               |               |
| Vaszary János             |                 |                  |                        |                  |               |               |
| Vesztróczy Manó           |                 |                  |                        |                  |               |               |
| Vidovszky Béla            |                 |                  |                        |                  |               |               |
| Vilmos Nagy               |                 |                  |                        |                  |               |               |
| Walleshausen Zsigmond     |                 |                  |                        |                  |               |               |
| Wildner Mária             |                 |                  |                        |                  |               |               |
| Zádor István              |                 |                  |                        |                  |               |               |
| Zemplényi Tivadar         |                 |                  |                        |                  |               |               |
| Zombory Lajos             |                 |                  |                        |                  |               |               |
